# Supplementary material for: [Ag4Br6] cluster-based 3D bromoargentate hybrid: crystal structure, optical/photoelectrical performance and theoretical study
Source: Royal Society of Chemistry journal article supplement (doi:10.1039/d3dt03264g), 2024-01-01
Supplement: d3dt03264g1.pdf [file d3dt03264g1.pdf]

## Electronic Supporting Information (ESI)

# **[Ag<sub>4</sub>Br<sub>6</sub>] cluster-based 3D bromoargentate hybrid: Crystal structure, optical/photoelectric performance and theoretical study**

*Ming-Hui Liu,<sup>a</sup> Wei-Yang Wen,<sup>b</sup> Hong-Yao Shen,<sup>a</sup> Yan Yang,<sup>a,b</sup> Jun Li,<sup>\*a,b</sup> and Bo Zhang<sup>\*a,b</sup>*

*<sup>a</sup>College of Chemistry and Chemical Engineering, Liaocheng University, Liaocheng 252059, China*

*<sup>b</sup>State Key Laboratory of Structural Chemistry, Fujian Institute of Research on the Structure of Matter, Chinese Academy of Sciences, Fuzhou 350002, China*

*\*E-mail: junli@lcu.edu.cn; bzhang@lcu.edu.cn*

## 1. More structural details of compound 1

**Table S1** Selected bond lengths (Å) and bond angles (°) for compound 1.

|                     |            |                       |            |
|---------------------|------------|-----------------------|------------|
| Ag(1)–N(1)          | 2.442(12)  | Ag(1)–Ag(1)#1         | 3.149(2)   |
| Ag(1)–Br(1)#1       | 2.7002(14) | Ag(1)–Ag(1)#3         | 3.149(2)   |
| Ag(1)–Br(1)         | 2.7002(15) | Ag(1)–Ag(1)#4         | 3.149(2)   |
| Ag(1)–Br(1)#2       | 2.7002(15) | Br(1)–K(1)            | 3.4639(18) |
| N(1)–Ag(1)–Br(1)#1  | 90.40(3)   | N(1)–Ag(1)–Br(1)#2    | 90.40(3)   |
| N(1)–Ag(1)–Br(1)    | 90.40(3)   | Br(1)#1–Ag(1)–Br(1)#2 | 119.995(1) |
| Br(1)#1–Ag(1)–Br(1) | 119.995(1) | Br(1)–Ag(1)–Br(1)#2   | 119.995(1) |

Symmetry transformations used to generate equivalent atoms: #1  $-y+1, x-1, -z$ ; #2  $-x+2, -z, y$ ; #3  $y+1, -x+1, -z$ ; #4  $-x+2, -y, z$ .

**Table S2** Hydrogen bonds (Å) and angles (°) for compound 1.

| D–H $\cdots$ A              | d(D–H) | d(H $\cdots$ A) | d(D $\cdots$ A) | $\angle$ (DHA) |
|-----------------------------|--------|-----------------|-----------------|----------------|
| C(1)–H(1B) $\cdots$ Br(1)#5 | 0.97   | 3.10            | 3.778(6)        | 127.9          |
| C(1)–H(1B) $\cdots$ Br(1)#1 | 0.97   | 3.10            | 3.778(6)        | 127.9          |
| C(1)–H(1A) $\cdots$ Br(1)   | 0.97   | 3.10            | 3.778(6)        | 127.9          |
| C(1)–H(1A) $\cdots$ Br(1)#6 | 0.97   | 3.10            | 3.778(6)        | 127.9          |

Symmetry transformations used to generate equivalent atoms: #1  $-y+1, x-1, -z$ ; #6  $y+1/2, -x+3/2, -z$ ; #5  $-x+3/2, -y+1/2, z$ .

**Table S3** Atomic coordinates ( $\times 10^4$ ) and equivalent isotropic displacement parameters ( $\text{Å}^2 \times 10^3$ ) for compound 1.

|       | <i>x</i> | <i>y</i> | <i>z</i> | $U_{\text{(eq)}}$ |
|-------|----------|----------|----------|-------------------|
| Ag(1) | 9178(1)  | 822(1)   | 822(1)   | 31(1)             |
| Br(1) | 10000    | 2442(1)  | 0        | 48(1)             |
| K(1)  | 10000    | 5000     | 0        | 50(2)             |
| N(1)  | 8137(5)  | 1863(5)  | 1863(5)  | 14(2)             |
| C(1)  | 7500     | 2500     | 1237(9)  | 20(2)             |
| N(2)  | 2500     | 2500     | 2500     | 23(6)             |

**Table S4** Anisotropic displacement parameters ( $\text{Å}^2 \times 10^3$ ) for compound 1.

|       | $U_{11}$ | $U_{22}$ | $U_{33}$ | $U_{23}$ | $U_{13}$ | $U_{12}$ |
|-------|----------|----------|----------|----------|----------|----------|
| Ag(1) | 31(1)    | 31(1)    | 31(1)    | –5(1)    | 5(1)     | 5(1)     |
| Br(1) | 57(1)    | 30(1)    | 57(1)    | 0        | 34(1)    | 0        |
| K(1)  | 50(2)    | 50(2)    | 50(2)    | 0        | 0        | 0        |
| N(1)  | 14(2)    | 14(2)    | 14(2)    | –2(3)    | 2(3)     | 2(3)     |
| C(1)  | 19(3)    | 19(3)    | 21(6)    | 0        | 0        | 2(5)     |
| N(1)  | 23(6)    | 23(6)    | 23(6)    | 0        | 0        | 0        |

**Table S5** Hydrogen coordinates ( $\times 10^4$ ) and isotropic displacement parameters ( $\text{Å}^2 \times 10^3$ ) for compound **1**.

|       | <i>x</i>  | <i>y</i> | <i>z</i> | $U_{\text{(eq)}}$ |
|-------|-----------|----------|----------|-------------------|
| H(1A) | 7910      | 2910     | 817      | 23                |
| H(1B) | 7090      | 2090     | 817      | 23                |
| H(1)  | 2330(100) | 2051(19) | 2051(19) | 34                |

## 2. Crystal structure

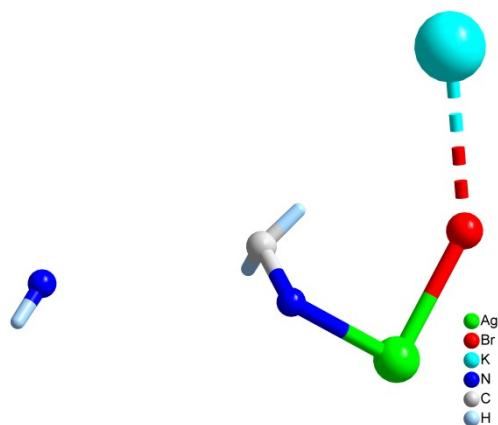

**Fig. S1** The asymmetric unit of compound **1**.

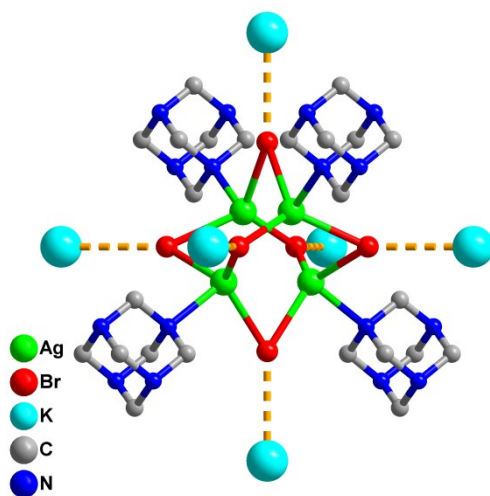

**Fig. S2** A comprehensive view of the coordination environment among the  $[\text{Ag}_4\text{Br}_6]$  cluster, Hmta ligands and the  $\text{K}^+$  ions.

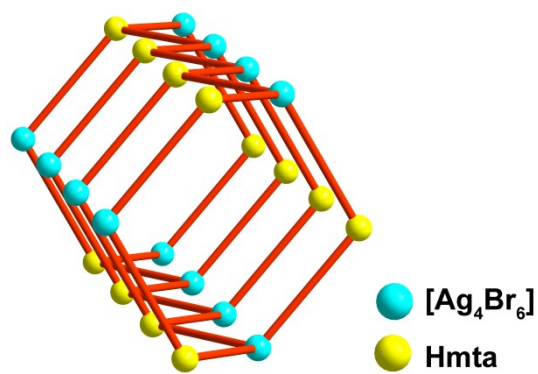

Fig. S3 The simplified topology for showing the 1D channel.

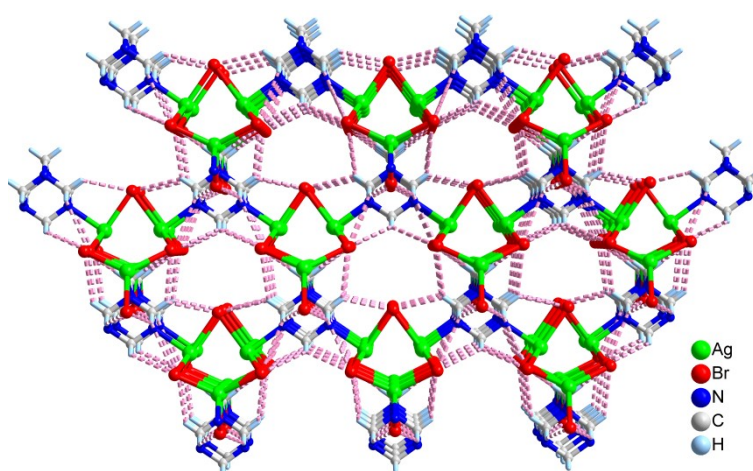

Fig. S4 Stacking diagram of compound **1** viewed along the  $[1\ 1\ 0]$  direction; dashed lines show the interactions of  $C-H\cdots Br$ .

### 3. EDX

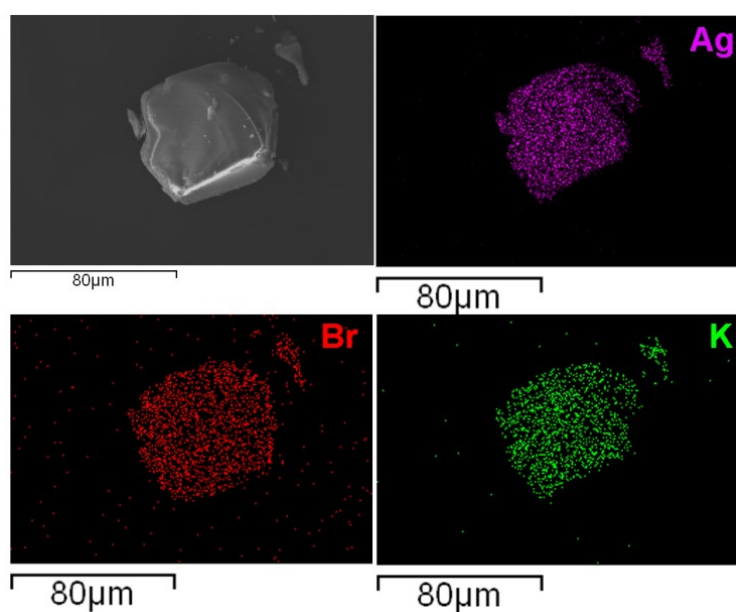

Fig. S5 The SEM and element mapping of Ag, Br and K for compound **1**.

#### 4. DSC

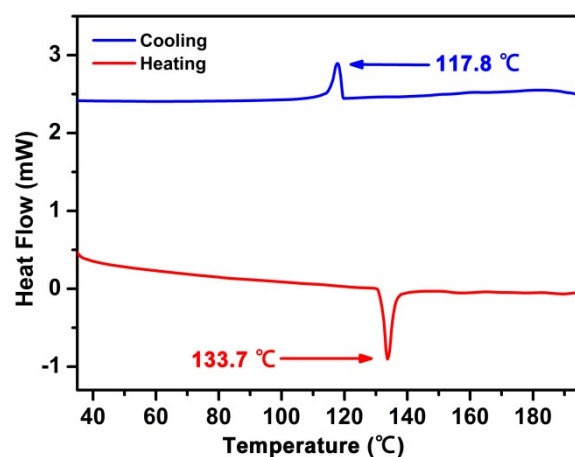

Fig. S6 The DSC curves of compound 1.

#### 5. Tauc plot

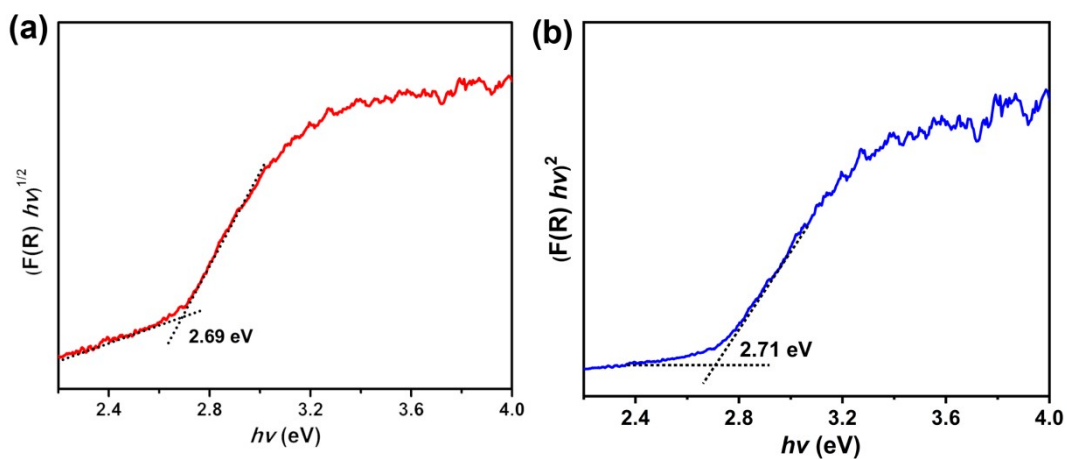

Fig. S7 Tauc plots of compound 1 corresponding to an indirect (a) and a direct (b) optical bandgap.

#### 6. XPS

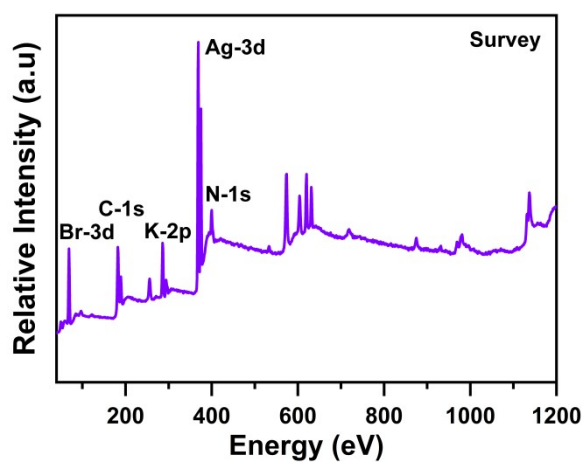

Fig. S8 The XPS survey spectrum of compound 1.

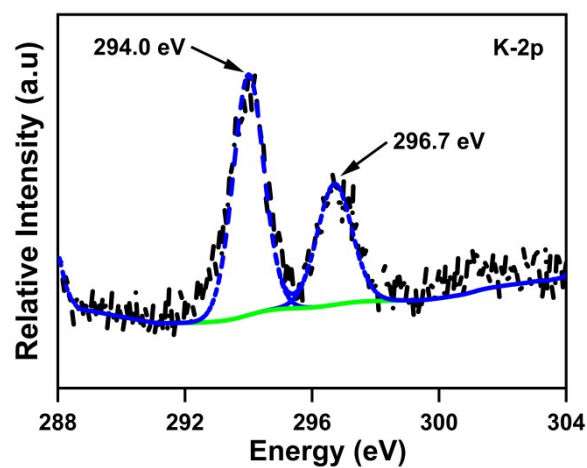

Fig. S9 The high-resolution K-2p peaks in compound 1.

## 7. DFT calculations

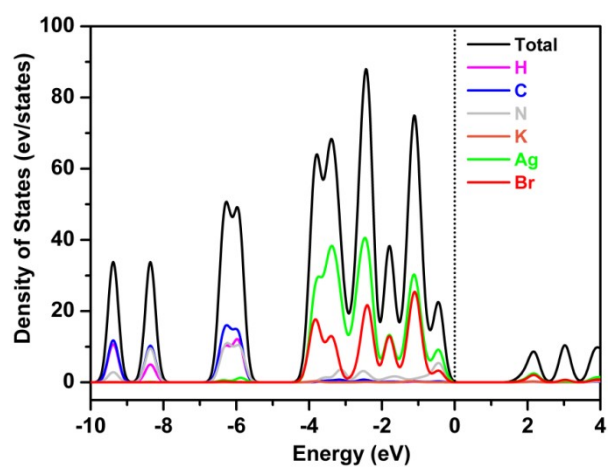

Fig. S10 The total density of states and partial density of states of compound 1. Fermi level is set at 0 eV (dashed line).

**Table S6** Summary of some representative haloargentate and halocuprate clusters coordinated by Hmta ligand and the derivative.

| Compound                                                                                                                          | Dimension | Cluster unit                                                           | Ligand  | Ref.      |
|-----------------------------------------------------------------------------------------------------------------------------------|-----------|------------------------------------------------------------------------|---------|-----------|
| K[NH <sub>4</sub> ][Ag <sub>4</sub> Br <sub>6</sub> (Hmta)]                                                                       | 3D        | [Ag <sub>4</sub> Br <sub>6</sub> ]                                     | Hmta    | This work |
| [NH <sub>4</sub> ][Me-Hmta][Ag <sub>4</sub> Br <sub>6</sub> (Hmta)]                                                               | 3D        | [Ag <sub>4</sub> Br <sub>6</sub> ]                                     | Hmta    | [1]       |
| [Hmta][Ag <sub>4</sub> I <sub>4</sub> (Hmta)]                                                                                     | 3D        | [Ag <sub>4</sub> I <sub>4</sub> ]                                      | Hmta    | [2]       |
| [NH <sub>4</sub> ][Ag <sub>5</sub> I <sub>6</sub> (Hmta)]                                                                         | 2D        | [Ag <sub>5</sub> I <sub>6</sub> ]                                      | Hmta    | [3]       |
| [Ag <sub>8</sub> I <sub>6</sub> (Hmta) <sub>2</sub> ] <sub>2</sub>                                                                | 3D        | [Ag <sub>8</sub> I <sub>6</sub> ]                                      | Hmta    | [2]       |
| [Cu <sub>4</sub> Cl <sub>6</sub> (Hmta)][Cu <sub>3</sub> (OH)(Hmta)]·3H <sub>2</sub> O                                            | 3D        | [Cu <sub>5</sub> Cl <sub>6</sub> ]; [Cu <sub>6</sub> Cl <sub>6</sub> ] | Hmta    | [4]       |
| [Cu <sub>4</sub> (μ-Cl) <sub>6</sub> (μ <sub>4</sub> -O)Cu(OH) <sub>2</sub> (μ-PTA=O) <sub>4</sub> ]·2Cl·EtOH·2.5H <sub>2</sub> O | 3D        | [Cu <sub>4</sub> Cl <sub>6</sub> O]                                    | PTA=O   | [5]       |
| [Et-Hmta][Cu <sub>4</sub> I <sub>6</sub> (Et-hmta)]·CH <sub>3</sub> CN                                                            | 2D        | [Cu <sub>4</sub> I <sub>6</sub> ]                                      | Et-Hmta | [6]       |

**Table S7** Summary of the band gaps of representative organic-inorganic hybrid haloargentates in the literature.

| Compound                                                                                         | Space group  | Band gap (eV) | Ref.      |
|--------------------------------------------------------------------------------------------------|--------------|---------------|-----------|
| K[NH <sub>4</sub> ][Ag <sub>4</sub> Br <sub>6</sub> (Hmta)]                                      | $F\bar{4}3m$ | 2.68          | This work |
| [Co(phen) <sub>3</sub> ] <sub>2</sub> Ag <sub>11</sub> I <sub>15</sub> ·H <sub>2</sub> O         | $P63/m$      | 2.84          | [7]       |
| [(Ni(bipy) <sub>3</sub> ][H-2,2-bipy]Ag <sub>3</sub> I <sub>6</sub>                              | $C2$         | 2.75          | [8]       |
| [Zn(bipy) <sub>3</sub> ] <sub>2</sub> Ag <sub>3</sub> I <sub>5</sub>                             | $P2_12_12_1$ | 2.61          | [9]       |
| K[Zn(bipy) <sub>3</sub> ] <sub>2</sub> Ag <sub>6</sub> Br <sub>11</sub>                          | $R\bar{3}$   | 2.61          | [10]      |
| [Zn(bipy) <sub>3</sub> ] <sub>2</sub> Ag <sub>13</sub> Br <sub>17</sub>                          | $Pcca$       | 2.71          | [10]      |
| [MV(Ag <sub>2</sub> Br <sub>4</sub> ) <sub>n</sub>                                               | $P2_1/n$     | 2.79          | [11]      |
| [NH <sub>4</sub> ] <sub>2</sub> AgBr <sub>3</sub>                                                | $Pnma$       | 2.50          | [12]      |
| [(EC)(Ag <sub>2</sub> I <sub>3</sub> ) <sub>n</sub>                                              | $P2_1/m$     | 2.80          | [13]      |
| [(PC)(Ag <sub>5</sub> I <sub>6</sub> ) <sub>n</sub>                                              | $Pbca$       | 2.72          | [13]      |
| [Ni(DMSO) <sub>6</sub> ][Ag <sub>5</sub> I <sub>7</sub> ]                                        | $Pbcm$       | 2.73          | [14]      |
| [V(DMSO) <sub>5</sub> (H <sub>2</sub> O)][Ag <sub>6</sub> I <sub>8</sub> ]                       | $P2_1/c$     | 2.61          | [14]      |
| [Ni(phen) <sub>3</sub> ] <sub>2</sub> Ag <sub>13</sub> Br <sub>17</sub> ·2DMSO·3H <sub>2</sub> O | $I2_13$      | 2.24          | [15]      |
| [C <sub>4</sub> H <sub>10</sub> N] <sub>4</sub> AgBiBr <sub>8</sub>                              | $C2/m$       | 2.85          | [16]      |
| [Co(bipy) <sub>3</sub> ] <sub>2</sub> Ag <sub>3</sub> I <sub>6</sub>                             | $R\bar{3}$   | 2.03          | [17]      |
| [Co(phen) <sub>3</sub> ] <sub>2</sub> Ag <sub>2</sub> I <sub>4</sub> ·3DMF                       | $P\bar{1}$   | 2.59          | [18]      |

**Table S8** Summary of the photocurrent densities of similar haloargentates in this work and references.

| Compound                                                                                         | Light source       | Photocurrent density ( $\mu\text{A cm}^{-2}$ ) | Ref.      |
|--------------------------------------------------------------------------------------------------|--------------------|------------------------------------------------|-----------|
| K[NH <sub>4</sub> ][Ag <sub>4</sub> Br <sub>6</sub> (Hmta)]                                      | $\lambda > 420$ nm | 0.38                                           | This work |
| [Co(bipy) <sub>3</sub> ] <sub>2</sub> Ag <sub>4</sub> Bi <sub>2</sub> Br <sub>16</sub>           | $\lambda > 420$ nm | 1.10                                           | [19]      |
| [Ni(bipy) <sub>3</sub> ]AgBiBr <sub>6</sub>                                                      | $\lambda > 420$ nm | 0.28                                           | [20]      |
| [Fe(bipy) <sub>3</sub> ]AgBiBr <sub>6</sub>                                                      | $\lambda > 420$ nm | 2.2                                            | [20]      |
| [Fe(phen) <sub>3</sub> ]Ag <sub>2</sub> PbBr <sub>6</sub>                                        | $\lambda > 420$ nm | 0.4                                            | [21]      |
| [Ni(phen) <sub>3</sub> ]Ag <sub>2</sub> PbBr <sub>6</sub>                                        | $\lambda > 420$ nm | 0.07                                           | [21]      |
| [NH <sub>4</sub> ][Fe(bipy) <sub>3</sub> ] <sub>2</sub> [Ag <sub>6</sub> Br <sub>11</sub> ]      | $\lambda > 420$ nm | 3.0                                            | [22]      |
| [Co(phen) <sub>3</sub> ]Ag <sub>2</sub> PbI <sub>6</sub>                                         | $\lambda > 420$ nm | 0.16                                           | [23]      |
| [Ni(5,5-dmpy) <sub>3</sub> ]Ag <sub>7</sub> I <sub>9</sub> ·CH <sub>3</sub> CN                   | $\lambda > 420$ nm | 0.14                                           | [23]      |
| [Co(5,5-dmpy) <sub>3</sub> ]Ag <sub>5</sub> I <sub>8</sub>                                       | $\lambda > 420$ nm | 0.14                                           | [23]      |
| [Ni(5,5-dmbpy) <sub>3</sub> ] <sub>2</sub> Ag <sub>4,9</sub> I <sub>8,9</sub> ·4H <sub>2</sub> O | $\lambda > 420$ nm | 0.5                                            | [24]      |
| [Ag <sub>2</sub> I <sub>2</sub> (phen)] <sub>n</sub>                                             | $\lambda > 420$ nm | 0.32                                           | [25]      |
| [AgI(bpt)] <sub>n</sub>                                                                          | $\lambda > 420$ nm | 0.66                                           | [25]      |

## 8. Reference

- Z. Z. Xue, X. D. Meng, X. Y. Li, S. D. Han, J. Pan and G. M. Wang, Luminescent thermochromism and white-light emission of a 3D [Ag<sub>4</sub>Br<sub>6</sub>] cluster-based coordination framework with both adamantane-like node and linker. *Inorg. Chem.* 2021, **60**, 4375–4379.
- R. C. Zhang, J. J. Wang, J. C. Zhang, M. Q. Wang, M. Sun, F. Ding, D. J. Zhang and Y. L. An, Coordination-induced syntheses of two hybrid framework iodides: A thermochromic luminescent thermometer. *Inorg. Chem.* 2016, **55**, 7556–7563.
- Z. Z. Xue, X. D. Meng, X. Y. Li, J. Pan and G. M. Wang, Penta-nuclear [Ag<sub>5</sub>I<sub>6</sub>] cluster-based photochromic hybrid: Synthesis, structure, dye sorption, and separation. *Cryst. Growth & Des.* 2021, **21**, 1055–1061.
- L. X. Hu, F. Wang, Y. Kang and J. Zhang, Structural design of zeolitic cluster organic frameworks from hexamethylentetramine and copper-halide clusters. *Cryst. Growth Des.* 2016, **16**, 7139–7144.
- E. I. Sliwa, D. S. Nesterov, M. V. Kirillova, J. Klak, A. M. Kirillov and P. Smolenski, A 3D MOF based on adamantoid tetracopper(II) and aminophosphine oxide cages: Structural features and magnetic and catalytic properties. *Inorg. Chem.* 2021, **60**, 9631–9644.
- A. V. Artem'ev, M. P. Davydova, X. Hei, M. I. Rakhmanova, D. G. Samsonenko, I. Y. Bagryanskaya, K. A. Brylev, V. P. Fedin, J. S. Chen, M. Cotlet and J. Li, Family of robust and strongly luminescent CuI-based hybrid networks made of ionic and dative bonds. *Chem. Mater.* 2020, **32**, 10708–10718.
- T. L. Yu, Y. B. Fu, Y. L. Wang, P. F. Hao, J. J. Shen and Y. L. Fu, Hierarchical symmetry transfer and flexible charge matching in five [M(phen)<sub>3</sub>]<sup>2+</sup> directed iodoargentates with 1 to 3D frameworks. *CrystEngComm* 2015, **17**, 8752–8761.
- X. W. Lei, C. Y. Yue, J. Q. Zhao, Y. F. Han, J. T. Yang, R. R. Meng, C. S. Gao, H. Ding, C. Y. Wang, W. D. Chen and M. C. Hong, Two types of 2D layered iodoargentates based on trimeric [Ag<sub>3</sub>I<sub>7</sub>] secondary building units and hexameric [Ag<sub>6</sub>I<sub>12</sub>] ternary building units: Syntheses, crystal structures, and efficient visible light responding photocatalytic properties. *Inorg. Chem.* 2015, **54**, 10593–10603.



9. X. W. Lei, C. Y. Yue, J. Q. Zhao, Y. F. Han, Z. R. Ba, C. Wang, X. Y. Liu, Y. P. Gong and X. Y. Liu, Syntheses, crystal structures, and photocatalytic properties of polymeric iodoargentates [TM(2,2-bipy)<sub>3</sub>]Ag<sub>3</sub>I<sub>5</sub> (TM = Mn, Fe, Co, Ni, Zn). *Eur. J. Inorg. Chem.* 2015, 4412–4419.
10. C. Y. Yue, X. W. Lei, Y. F. Han, X. X. Lu, Y. W. Tian, J. Xu, X. F. Liu and X. Xu, Transition-metal-complex cationic dyes photosensitive to two types of 2D layered silver bromides with visible-light-driven photocatalytic properties. *Inorg. Chem.* 2016, **55**, 12193–12203.
11. Y. C. Zhu, J. J. Shen, T. L. Yu, Y. L. Fu and P. F. Hao, Halogen-dependent thermochromic properties in three methyl-viologen/haloargentate charge transfer (CT) salts. *J. Clust. Sci.* 2016, **27**, 1283–1291.
12. T. D. Creason, H. Fattal, I. W. Gilley, T. M. McWhorter, M. H. Du and B. Saparov, (NH<sub>4</sub>)<sub>2</sub>AgX<sub>3</sub> (X = Br, I): 1D silver halides with broadband white light emission and improved stability. *ACS Mater. Au* 2021, **1**, 62–68.
13. J. J. Shen, C. F. Zhang, T. L. Yu, L. An and Y. L. Fu, Structural and functional modulation of five 4-cyanopyridinium iodoargentates built up from cubane-like Ag<sub>4</sub>I<sub>4</sub> nodes. *Cryst. Growth & Des.* 2014, **14**, 6337–6342.
14. Y. Mu, D. Wang, X. D. Meng, J. Pan, S. D. Han and Z. Z. Xue, Construction of iodoargentates with diverse architectures: Template syntheses, structures, and photocatalytic properties. *Cryst. Growth & Des.* 2020, **20**, 1130–1138.
15. Y. L. Shen, L. M. Zhang, S. F. Li, P. P. Sun, W. Q. Jiang and D. X. Jia, Syntheses, crystal structures, and photocatalytic properties of bromoargentates induced by transition-metal-phen complex cations. *Eur. J. Inorg. Chem.* 2018, 826–834.
16. B. A. Connor, L. Leppert, M. D. Smith, J. B. Neaton and H. I. Karunadasa, Layered halide double perovskites: Dimensional reduction of Cs<sub>2</sub>AgBiBr<sub>6</sub>. *J. Am. Chem. Soc.* 2018, **140**, 5235–5240.
17. C. Y. Tang, Y. W. Sun, J. B. Liu, Q. F. Xu and C. Y. Zhang, [Co(2,2'-bipy)<sub>3</sub>]Ag<sub>3</sub>I<sub>6</sub> with a hole structure facilitates dye adsorption and photocatalytic reduction. *Dalton Trans.* 2022, **51**, 16784–16789.
18. C. Y. Tang, J. Yao, Y. Y. Li, Z. R. Xia, J. B. Liu and C. Y. Zhang, Transition-metal-complex-directed synthesis of hybrid iodoargentates with single-crystal to single-crystal structural transformation and photocatalytic properties. *Inorg. Chem.* 2020, **59**, 13962–13971.
19. B. Zhang, J. Li, M. Pang, X. Chen and M. Z. Liu, Two [Co(bipy)<sub>3</sub>]<sup>3+</sup>-templated silver halobismuthate hybrids: Syntheses, structures, photocurrent responses, and theoretical studies. *Inorg. Chem.* 2022, **61**, 9808–9815.
20. B. Zhang, J. Li, M. Pang, Y. S. Wang, M. Z. Liu and H. M. Zhao, Four discrete silver iodobismuthates/bromobismuthates with metal complexes: Syntheses, structures, photocurrent responses, and theoretical studies. *Inorg. Chem.* 2022, **61**, 406–413.
21. X. C. Ren, J. Li, W. H. Wang, Y. N. Shao, B. Zhang and L. Z. Li, Hybrid silver haloplumbates containing metal complexes: Syntheses, structures and photoelectric properties. *J. Solid State Chem.* 2022, **308**, 122912.
22. B. Zhang, J. Li, X. Chen, M. F. Yang, H. Y. Shen and J. C. Zhu, [NH<sub>4</sub>][Fe(bipy)<sub>3</sub>]<sub>2</sub>[Ag<sub>6</sub>Br<sub>11</sub>]: Synthesis, structure, characterization and photocurrent response. *Inorg. Chem. Commun.* 2022, **137**, 109250.
23. M. H. Liu, X. C. Ren, W. Y. Wen, B. H. Li, J. Q. Li, J. Li and B. Zhang, Three iodoargentate-based hybrids decorated by metal complexes: Structures, optical/photoelectric properties and theoretical studies *Molecules* 2023, **28**, 6116.
24. B. Zhang, W. A. Li, J. Li, Y. P. Xu, Y. R. Xu, W. H. Wang and G. D. Zou, [Ni(5,5'-dmbpy)<sub>3</sub>]<sub>2</sub>Ag<sub>4</sub>I<sub>8.9</sub>·4H<sub>2</sub>O: A discrete iodoargentate with transition metal complexes. *Inorg. Chem. Commun.* 2020, **121**, 180219–180223.
25. L. Huang and J. Zhou, Two hybrid polymeric iodoargentates incorporating aromatic

*N*-Heterocycle derivatives as electron acceptors. *Inorg. Chem.* 2020, **59**, 16814–16818.
